# Supplementary material for: Polymorphism and phase transformations in cobaltacarborane molecular crystals
Source: Royal Society of Chemistry journal article supplement (doi:10.1039/b704833e), 2007-01-01

Electronic Supplementary Material for CrystEngComm.

## **Polymorphism and phase transformations in cobaltacarborane molecular crystals: Evidence for very weak intermolecular C–H···H–B interactions**

José Giner Planas,<sup>a</sup> Clara Viñas,<sup>a</sup> Francesc Teixidor,<sup>\*a</sup> Mark E. Light,<sup>b</sup> and Michael B. Hursthouse<sup>b</sup>

<sup>a</sup> *Institut de Ciència de Materials de Barcelona, Campus U.A.B. 08193 Bellaterra, Spain. E-mail: teixidor@icmab.es*

<sup>b</sup> *School of Chemistry, University of Southampton, Highfield, Southampton. UK SO17 1BJ; Fax: +44 2380596723; Tel: +44 2380596721; E-mail: M.B.Hursthouse@soton.ac.uk*

### **Contents**

- 1) Table for bond lengths of both polymorphs of **1**.
- 2) Complete solid IR for forms **I** and **II**
- 3) Phase transformation by IR
- 4) Solution and gas phase IR for **1**.

**Table S1.** Comparison of Bond Lengths (Å) for both polymorphs of **1**

|         | Form I   | Form II    |
|---------|----------|------------|
| C1–C2   | 1.637(6) | 1.630(3)   |
| C1–B5   | 1.698(6) | 1.692(3)   |
| C1–B4   | 1.697(6) | 1.719(3)   |
| C1–B6   | 1.724(6) | 1.721(3)   |
| C1–Co1  | 1.991(4) | 2.0092(18) |
| C2–B11  | 1.692(6) | 1.691(3)   |
| C2–B6   | 1.717(6) | 1.718(3)   |
| C2–B7   | 1.709(6) | 1.723(3)   |
| C2–Co1  | 2.005(4) | 2.0047(18) |
| C3–C7   | 1.417(6) | 1.402(4)   |
| C3–C4   | 1.421(6) | 1.409(3)   |
| C3–Co1  | 2.059(4) | 2.056(2)   |
| C4–C5   | 1.415(7) | 1.406(3)   |
| C4–Co1  | 2.030(5) | 2.036(2)   |
| C5–C6   | 1.404(7) | 1.422(4)   |
| C5–Co1  | 2.028(5) | 2.035(2)   |
| C6–C7   | 1.384(6) | 1.418(4)   |
| C6–Co1  | 2.044(5) | 2.046(2)   |
| C7–Co1  | 2.055(4) | 2.069(2)   |
| B4–B9   | 1.792(6) | 1.786(3)   |
| B4–B5   | 1.800(6) | 1.789(3)   |
| B4–B8   | 1.803(6) | 1.808(3)   |
| B4–Co1  | 2.054(5) | 2.076(2)   |
| B5–B6   | 1.758(6) | 1.771(3)   |
| B5–B10  | 1.770(6) | 1.779(3)   |
| B5–B9   | 1.768(6) | 1.784(3)   |
| B6–B11  | 1.768(6) | 1.763(3)   |
| B6–B10  | 1.768(5) | 1.769(3)   |
| B7–B12  | 1.772(7) | 1.778(3)   |
| B7–B11  | 1.778(7) | 1.793(3)   |
| B7–B8   | 1.812(6) | 1.817(3)   |
| B7–Co1  | 2.065(5) | 2.069(2)   |
| B8–B9   | 1.784(6) | 1.791(3)   |
| B8–B12  | 1.783(6) | 1.794(3)   |
| B8–Co1  | 2.106(4) | 2.106(2)   |
| B9–B12  | 1.777(6) | 1.786(3)   |
| B9–B10  | 1.768(6) | 1.790(3)   |
| B10–B11 | 1.766(6) | 1.773(3)   |
| B10–B12 | 1.766(6) | 1.786(3)   |
| B11–B12 | 1.761(7) | 1.781(3)   |

**Figure S1.** IR spectrum of form **I**.

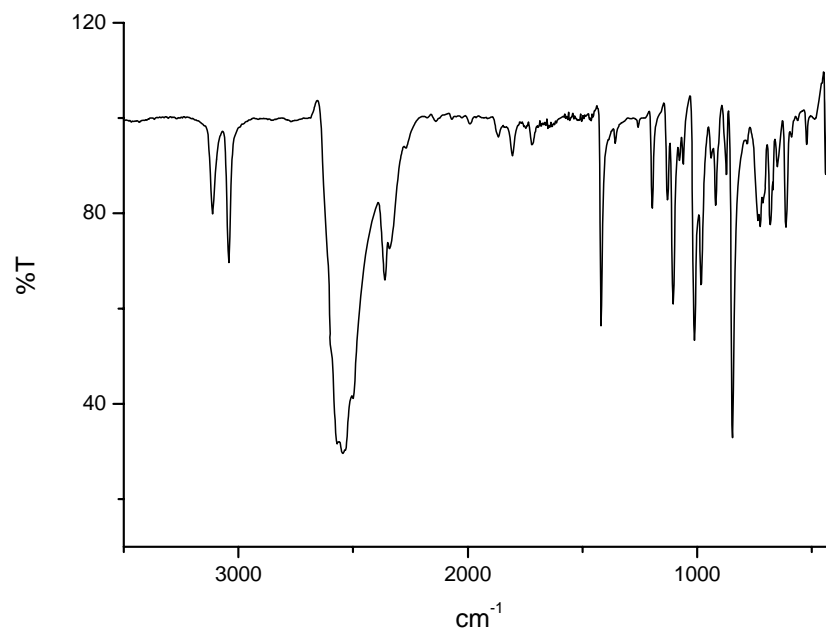

**Figure S2.** IR spectrum of form **II**.

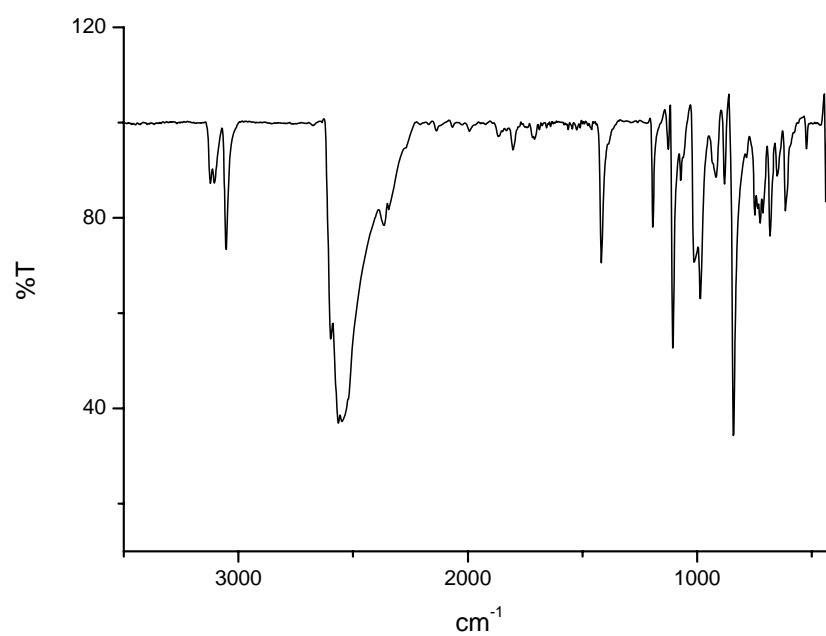

**Figure S3.** Phase transformation by IR.

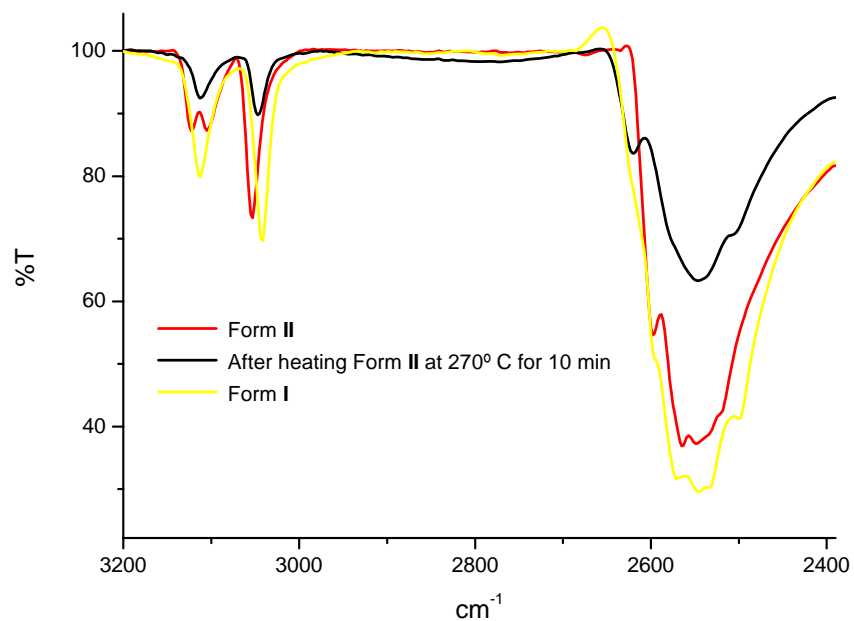

**Figure S4.** Comparison between experimental (Bottom: 0.047M solution in CH<sub>2</sub>Cl<sub>2</sub>) and calculated in the gas phase (top) IR Spectra of *closo*-[3-Co( $\eta^5$ -C<sub>5</sub>H<sub>5</sub>)-1,2-C<sub>2</sub>B<sub>9</sub>H<sub>11</sub>] (1). Only the relevant section with the C-H and B-H stretching bands are shown.

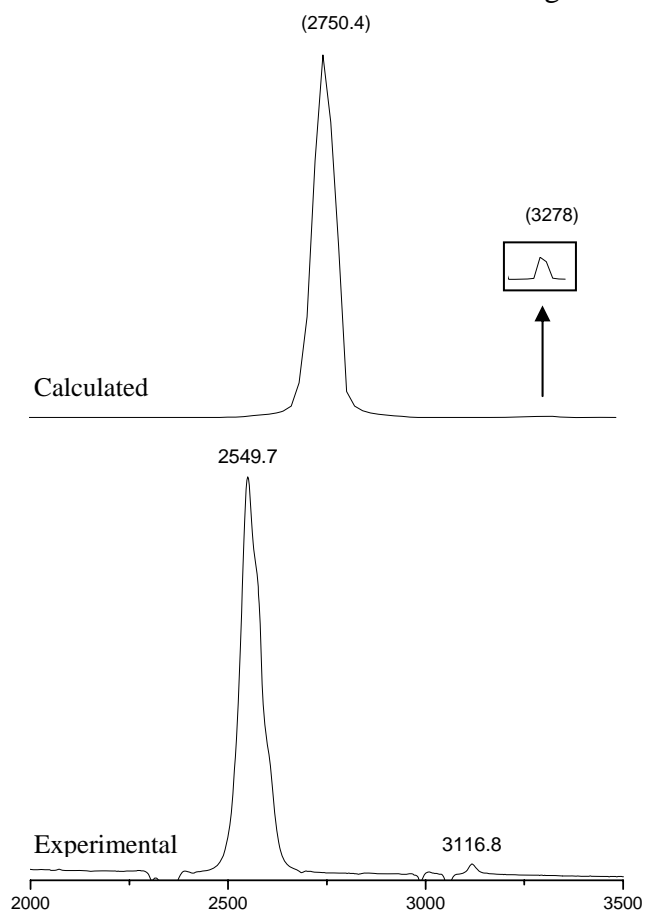

Supplement: b704833e.pdf [file b704833e.pdf]
